# Supplementary material for: Kinetics and possible mechanism of chlorogenic acid–water complex formation
Source: Royal Society of Chemistry journal article supplement (doi:10.1039/d3nj03121g), 2023-01-01
Supplement: d3nj03121g1.pdf [file d3nj03121g1.pdf]

# Kinetics and possible mechanism of chlorogenic acid-water complexes formation

Piotr Hołowiński, Andrzej L. Dawidowicz,\* Rafał Typek

## 1. External calibration for molecular weight determination in DMSO-d<sub>6</sub> using NMR DOSY

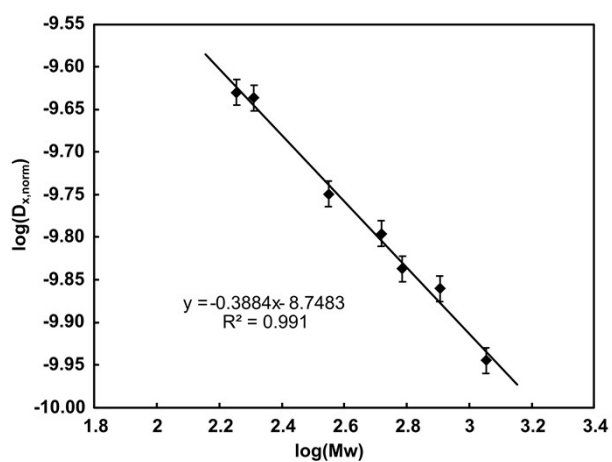

**Figure S1.** External calibration curve constructed for molecular weight estimation of polyphenolic compounds in DMSO-d<sub>6</sub>.

## 2. Determination of 5-CQA\*H<sub>2</sub>O molecular weight using external calibration curve in DMSO-d<sub>6</sub> and NMR DOSY

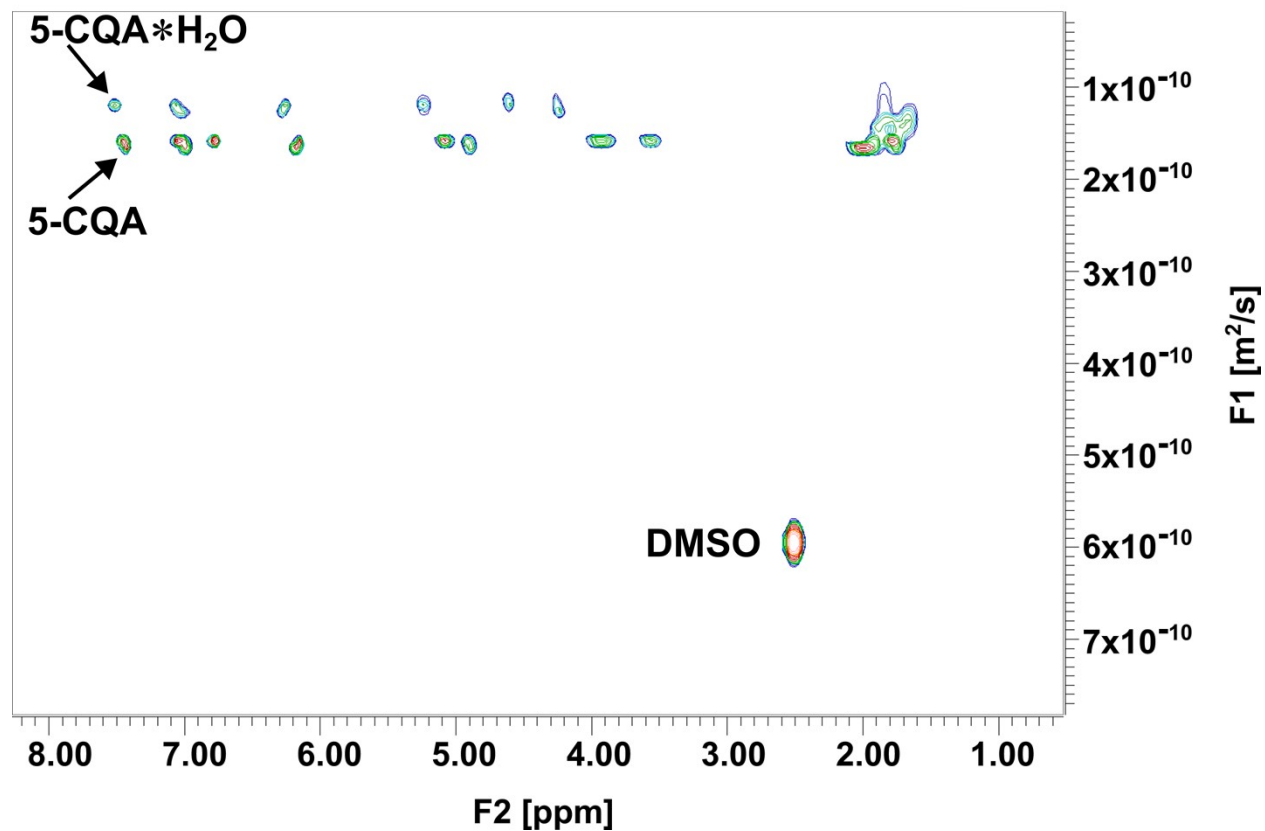

**Figure S2.** <sup>1</sup>H DOSY spectrum of dry residue obtained from incubated 5-CQA water solution dissolved in DMSO-d<sub>6</sub>.

**TABLE S1.** Results of the molecular weight estimation of 5-CQA\*H<sub>2</sub>O complexes in DMSO-d<sub>6</sub> using NMR DOSY measurements and external calibration method.

|                                                                                                   |                        |
|---------------------------------------------------------------------------------------------------|------------------------|
| Average value of diffusion coefficient of 5-CQA*H <sub>2</sub> O <sup>a</sup> [m <sup>2</sup> /s] | 1.20•10 <sup>-10</sup> |
| Logarithm of normalized diffusion coefficient of 5-CQA*H <sub>2</sub> O                           | -9.877                 |
| Determined molecular weight of 5-CQA*H <sub>2</sub> O [g/mol]                                     | 805.42                 |
| Theoretical molecular weight of 5-CQA*H <sub>2</sub> O [g/mol]                                    | 744.65                 |

<sup>a</sup> Average was calculated over all non-overlapping signals of 5-CQA\*H<sub>2</sub>O-1 and 5-CQA\*H<sub>2</sub>O-2 as the differences in diffusion coefficients of both 5-CQA\*H<sub>2</sub>O did not exceed experimental error for the employed method for determination of diffusion coefficients.
